# Supplementary material
Source: PubMed Central journal article supplement (PMC3696765)
Supplement: 1308936110_pnas.201308936SI.pdf [file 1308936110_pnas.201308936SI.pdf]

# Supporting Information

Lu et al. 10.1073/pnas.1308936110

## SI Materials and Methods

**Plant Materials.** Samples were collected from 6-mo-old *Populus trichocarpa* (Nisqually-1) WT and transgenic trees maintained in a greenhouse as described (1).

**PtrLAC Gene Identification and Phylogenetic Analysis.** *PtrLACs* were identified by comparison of 17 *Arabidopsis* laccase protein sequences (TAIR, [www.arabidopsis.org/](http://www.arabidopsis.org/)) against the *P. trichocarpa* genome v2.2 using the tBLASTn and BLASTp algorithms ([www.ncbi.nlm.nih.gov/BLAST](http://www.ncbi.nlm.nih.gov/BLAST)) (2, 3), applying an e-value cutoff of  $1e^{-10}$  to screen for functional homologs (4, 5). Cu-oxidase domains were detected by BLAST of the deduced *PtrLAC* sequences against the National Center for Biotechnology Information conserved domain database ([www.ncbi.nlm.nih.gov/Structure/cdd/wrpsb.cgi](http://www.ncbi.nlm.nih.gov/Structure/cdd/wrpsb.cgi)). A phylogenetic tree was constructed using MEGA 5.1 (6). The reliability of branching was assessed by bootstrap resampling using 1,000 replicates. Nodes supported by bootstrap probabilities >50% are shown.

**Quantitative Real-Time PCR of Laccase Transcript Abundance.** Total RNAs from young leaves, mature leaves, young stems, young roots, stem differentiating xylem (SDX), and phloem were isolated using cetyltrimethylammonium bromide (CTAB) (7). Gene-specific forward and reverse primers (Table S6) were used for quantitative RT-PCR (qRT-PCR) to estimate gene-specific laccase transcript abundance in different tissues as described (8, 9).

**Computational Prediction and Experimental Validation of ptr-miR397a Targets.** *Ptr-miR397a* targets were predicted from the *P. trichocarpa* genome v2.2 by the psRNATarget server (2, 10). A penalty score cutoff of 2.5 calculated as previously described (11) was applied to potential target sites in the microRNA (miRNA): mRNA duplexes. Experimental validation of predicted targets was carried out using a modified RNA ligase-mediated 5'-rapid amplification of cDNA ends (RACE) using the GeneRacer kit (Invitrogen) as described (11). PCRs were performed on cDNA from SDX and young roots of 6-mo-old *P. trichocarpa* plants using the GeneRacer 5' primer and gene-specific primers (Table S7). Nested PCRs were performed using the GeneRacer 5' nested primer and the nested gene-specific primers (Table S7).

**Isolation of *PtrMIR397a* cDNA.** The transcriptional start site and the polyadenylation site of *PtrMIR397a* were determined by 5'- and 3'-RACE using GeneRacer. The gene-specific and nested gene-specific primers are 5'-GTGAGCTCCACAGACCACGCAAAT-3' and 5'-CGCAAATGCCTGTTTCGCACCACAA-3' for 5' RACE and 5'-GCATCTTGAAGCATTGGAATCAGAGA-3' and 5'-CAGAGATACGAGGGCCCAATGGTA-3' for 3' RACE, respectively. The *PtrMIR397a* cDNA was amplified by PCR using the gene-specific forward primer (5'-GCGGATCCATTGCA-TTTGAAAGTGAGCTAGCTA-3'; BamHI site is underlined) and the gene-specific reverse primer (5'-GTCCCCGGCTTAG-AACTTACACGGGACCTA-3'; SmaI site is underlined). PCR products were cloned into *pCR4-TOPO* vectors (Invitrogen) and sequence validated.

**Vector Construction of CaMV35S::MIR397a and Transformation.** The *PtrMIR397a* cDNA was excised from the *pCR4-TOPO* vector with BamHI/SmaI and then inserted into the modified *pBI121* with a double CaMV 35S promoter to replace the *GUS* gene. The construct was mobilized into *Agrobacterium* strain C58 using

the freeze/thaw method for *P. trichocarpa* transformation as described (12).

**Light Microscopy.** The stem transverse section preparation and image taken were followed as described by Li et al. (1).

**qRT-PCR Analysis of *Ptr-miR397a*.** SDX total RNA from three WT trees and nine transgenic lines of overexpressing *PtrMIR397a* was isolated using CTAB (7). Quantitation of *ptr-miR397a* by qRT-PCR was conducted as described (13).

**Wood Chemical Composition.** Debarked increment cores (12 cm) were cut into two sections (6 cm), placed in acetone, and held for 2 d at room temperature. Acetone was drained and replaced four times at 48-h intervals. After drying, the wood was ground in a Wiley mill with a 40-mesh screen. The resulting wood meals (40–60 mesh) was used for lignin content determination (14) to estimate both Klason lignin and acid-soluble lignin for total lignin content using an extinction coefficient of  $110 \text{ g}^{-1} \cdot \text{cm}^{-1}$  at 205 nm (15). Neutral sugars in the acid-soluble fraction were derivatized to alditol acetates for quantitation by gas chromatography using a flame ionization detector (GC-FID; Agilent 7890A) (16). The uronic acid content was determined by the sulfuric acid-carbazole method (17). Glucuronolactone was used as the standard, and the optical density was measured at 530 nm.

**Nitrobenzene Oxidation Analysis.** Nitrobenzene oxidation analysis was conducted following Katahira and Nakatsubo (18). Extractive-free wood meal was oxidized with nitrobenzene, extracted with  $\text{CH}_2\text{Cl}_2$ , trimethylsilylated with *N*-methyl-*N*-(trimethylsilyl)-trifluoroacetamide (Sigma), and quantified by GC-FID using a DB-5 GC-column.

**NMR Sample Preparation and NMR Experiments.** Two grams of 40- to 60-mesh wood meal samples were ball-milled using a Planetary micromill Pulverisette 7 (Fritsch, Germany) in a 50-mL  $\text{ZrO}_2$  bowl with 18  $\text{ZrO}_2$  ball bearings (1 cm diameter) at 600 rpm, with 15 min of rest after every 30 min of milling. The total actual milling time for each sample was 3 h. Cellulolytic enzyme lignin (CEL) was isolated according to Chang et al. (19). One gram of the ball-milled material was suspended in 20 mL 20 mM NaOAc buffer (pH 4.5). Crude cellulase (50 mg) was added, and the reaction was incubated at 48 °C for 48 h. The solution was centrifuged, and the residues were washed with 20 mL distilled water three times and freeze-dried.

The CELs were collected directly into NMR tubes (40 mg for each sample) and dissolved using  $\text{DMSO-}d_6$ /pyridine- $d_5$  (4:1) (20, 21). NMR spectra were acquired on a Bruker Biospin Avance 700-MHz spectrometer equipped with a cryogenically cooled 5-mm TXI  $^1\text{H}/^{13}\text{C}/^{15}\text{N}$  gradient probe with inverse geometry (proton coils closest to the sample). The central DMSO solvent peak was used as an internal reference ( $\delta_C$ , 39.5;  $\delta_H$ , 2.49 ppm). The  $^{13}\text{C}$ - $^1\text{H}$  correlation experiment was an adiabatic heteronuclear single-quantum correlation (HSQC) experiment (Bruker standard pulse sequence “hsqcetgpsisp.2”; phase-sensitive gradient-edited-2D HSQC using adiabatic pulses for inversion and refocusing) (22). HSQC experiments were carried out using the following parameters: acquired from 11.5 to  $-0.5$  ppm in F2 ( $^1\text{H}$ ) with 3,366 data points (acquisition time, 200 ms) and 215 to  $-5$  ppm in F1 ( $^{13}\text{C}$ ) with 560 increments (F1 acquisition time, 7.2 ms) of 32 scans with a 1-s interscan delay; the  $d_{24}$  delay was set to 0.86 ms (1/8J, J = 145 Hz). The total acquisition time for a sample was 6 h. Processing used typical matched Gaussian apodization (GB = 0.001, LB =  $-0.5$ ) in F2 and squared cosine-

bell and one level of linear prediction (32 coefficients) in F1. Volume integration of contours in HSQC plots used Bruker's TopSpin 3 (Mac version) software and used spectra reprocessed without linear prediction.

#### RNA-seq Data Processing and Differential Expressed Gene Analysis.

One microgram SDX total RNA from three WT and nine transgenic lines was used for the RNA-seq library construction following the TruSeq RNA Sample Prep v2 LS protocol (Illumina). Six RNA-seq libraries were pooled at equal concentrations for multiplex sequencing. Libraries were assayed for quality and quantity (NCSU Genomic Sciences Laboratory) and sent for sequencing by BGI on an Illumina HiSeq. 2000. The resulting sequences (~100b) were mapped to the *P. trichocarpa* genome v2.0, gene annotation v2.2 ([www.phytozome.org](http://www.phytozome.org)) using TOPHAT (23). The frequency of raw counts was determined by BEDtools (24) and normalized using the Trimmed mean of M value (TMM) (25). The genes with a count lower than 15 per million per library were filtered out, and differential expressed genes (DEGs) were obtained by pairwise comparison of transgenic and WT libraries using edgeR/Bioconductor (26). The significance of DEGs is based on a false discovery rate (FDR) of 0.05. We inferred the protein domains in the full *P. trichocarpa* proteome and in the DEGs using InterproScan (27) and estimated the extent of enrichment of specific domains in the DEGs using hypergeometric probability (28).

**Laccase Enzyme Assays.** Laccase purification and enzyme assay followed Berth et al. (29) with modifications. Three grams of SDX was homogenized in 15 mL extraction buffer [25 mM Tris, pH 7.0, 200 mM CaCl<sub>2</sub>, 10% (vol/vol) glycerol, 4 μM sodium cacodylate, 1 mM PMSF, 1 mg/mL leupeptin, and 1 mg/mL pepstatin A]. Proteins were eluted from Concanavalin-A Sepharose with 10 mL elution buffer (29), and 50 μL was used in the enzyme assays (29).

**Construction of a Genetic Regulatory Network using a Graphic Gaussian Model Algorithm.** First, we developed and used a graphic Gaussian model (GGM) bottom-up algorithm to calculate relationships of selected genes with specific transcription factors

(TFs) selected from a full genomewide pool of TFs. We constructed a three-layer genetic regulatory network (GRN) beginning with those genes that encode enriched protein domains of either laccases (also classified as types 1, 2, and 3 multicopper oxidases), chalcone/stilbene synthases, or peroxidases. Beginning with these genes as the bottom (first layer) of a hierarchical network, we used the GGM to select TFs that represent the next level of regulators in the network (second layer). The selected TFs were then used in the same way to select a higher level of regulators, providing a three-layered GRN. The GGM bottom-up algorithm works as follows. First, it selects a pair of genes,  $x$  and  $y$  from the bottom layer, and then examines their relationships with each TF from a genomewide TF pool that includes 1,208 TFs and ptr-miR397a. Transcript abundance data were obtained from RNA-seq. Relative abundance of ptr-miR397a was obtained by qRT-PCR. We tested if the interaction with any TF (or ptr-miR397a) denoted as  $z$ , increases the correlation of  $x$  and  $y$ . We calculated Spearman partial correlations between  $x$  and  $y$  in the absence of  $z$ ,  $r_{xy|z} = pcor(x, y|z)$  and compared this with the  $x$  and  $y$  correlation,  $r_{xy}$ , where  $r_{xy}$  is the Spearman coefficient ( $\rho$ ) of variables  $x$  and  $y$ . If  $r_{xy}$  is significant and  $r_{xy|z} = 0$  (insignificant), then  $z$  interferes with the correlation of  $x$  and  $y$ . If  $r_{xy}$  is significant and  $r_{xy|z}$  is significant, we tested the significance of difference  $d$  following (30), where

$$d = r_{xy} - \frac{r_{xy} - r_{zx}r_{zy}}{\sqrt{(1-r_{zx}^2)(1-r_{zy}^2)}}$$

If  $d$  is significant, we infer that  $z$  interferes (regulates)  $x$  and  $y$ . After all combinations of  $x$  and  $y$  in the bottom layer were tested with all TFs, we sorted all TF genes based on the total number of times each of them interfered with all pairwise combinations of genes in the bottom layer. TF genes, with high interference frequencies (including ptr-miR397a), were selected to be the second-layer regulators. The same procedure was then applied to the second layer of regulators to obtain the third layers of regulators.

- Li Q, et al. (2011) Down-regulation of glycosyltransferase 8D genes in *Populus trichocarpa* caused reduced mechanical strength and xylan content in wood. *Tree Physiol* 31(2):226–236.
- Tuskan GA, et al. (2006) The genome of black cottonwood, *Populus trichocarpa* (Torr. & Gray). *Science* 313(5793):1596–1604.
- Altschul SF, et al. (1997) Gapped BLAST and PSI-BLAST: A new generation of protein database search programs. *Nucleic Acids Res* 25(17):3389–3402.
- Ma Y, et al. (2012) Genome-wide identification and characterization of novel genes involved in terpenoid biosynthesis in *Salvia miltiorrhiza*. *J Exp Bot* 63(7):2809–2823.
- Wu B, et al. (2012) Comprehensive transcriptome analysis reveals novel genes involved in cardiac glycoside biosynthesis and miRNAs associated with secondary metabolism and stress response in *Digitalis purpurea*. *BMC Genomics* 13(1):15.
- Tamura K, et al. (2011) MEGA5: Molecular evolutionary genetics analysis using maximum likelihood, evolutionary distance, and maximum parsimony methods. *Mol Biol Evol* 28(10):2731–2739.
- Chang S, Puryear J, Cairney J (1993) A simple and efficient method for isolating RNA from pine trees. *Plant Mol Biol Rep* 11(2):113–116.
- Lu S, Zhou Y, Li L, Chiang VL (2006) Distinct roles of cinnamate 4-hydroxylase genes in *Populus*. *Plant Cell Physiol* 47(7):905–914.
- Lu S, Sun YH, Amerson H, Chiang VL (2007) MicroRNAs in loblolly pine (*Pinus taeda* L.) and their association with fusiform rust gall development. *Plant J* 51(6):1077–1098.
- Dai X, Zhuang Z, Zhao PX (2011) Computational analysis of miRNA targets in plants: Current status and challenges. *Brief Bioinform* 12(2):115–121.
- Lu S, et al. (2005) Novel and mechanical stress-responsive MicroRNAs in *Populus trichocarpa* that are absent from *Arabidopsis*. *Plant Cell* 17(8):2186–2203.
- Song J, Lu S, Chen ZZ, Lourenco R, Chiang VL (2006) Genetic transformation of *Populus trichocarpa* genotype Nisqually-1: A functional genomic tool for woody plants. *Plant Cell Physiol* 47(11):1582–1589.
- Shi R, Sun YH, Zhang XH, Chiang VL (2012) Poly(T) adaptor RT-PCR. *Methods Mol Biol* 822:53–66.
- Yeh TF, et al. (2005) Rapid screening of wood chemical component variations using transmittance near-infrared spectroscopy. *J Agric Food Chem* 53(9):3328–3332.
- Dence CW (1992) The determination of lignin. *Methods in Lignin Chemistry* eds Lin SY, Dence CW (Springer, Berlin Heidelberg), pp 33–61.
- Blakeney AB, Harris PJ, Henry RJ, Stone BA (1983) A simple and rapid preparation of alditol acetates for monosaccharide analysis. *Carbohydr Res* 113(2):291–299.
- Bitter T, Muir HM (1962) A modified uronic acid carbazole reaction. *Anal Biochem* 4(4):330–334.
- Katahira R, Nakatsubo F (2001) Determination of nitrobenzene oxidation products by GC and H-1-NMR spectroscopy using 5-iodovanillin as a new internal standard. *J Wood Sci* 47(5):378–382.
- Chang H, Cowling EB, Brown W (1975) Comparative studies on cellulolytic enzyme lignin and milled wood lignin of sweetgum and spruce. *Holzforchung* 29(5):153–159.
- Kim H, Ralph J, Akiyama T (2008) Solution-state 2D NMR of ball-milled plant cell wall gels in DMSO-d(6). *Bioenergy Res* 1(1):56–66.
- Kim H, Ralph J (2010) Solution-state 2D NMR of ball-milled plant cell wall gels in DMSO-d(6)/pyridine-d(5). *Org Biomol Chem* 8(3):576–591.
- Kupče E, Freeman R (2007) Compensated adiabatic inversion pulses: broadband INEPT and HSQC. *J Magn Reson* 187(2):258–265.
- Trapnell C, Pachter L, Salzberg SL (2009) TopHat: Discovering splice junctions with RNA-Seq. *Bioinformatics* 25(9):1105–1111.
- Quinlan AR, Hall IM (2010) BEDTools: A flexible suite of utilities for comparing genomic features. *Bioinformatics* 26(6):841–842.
- Robinson MD, Oshlack A (2010) A scaling normalization method for differential expression analysis of RNA-seq data. *Genome Biol* 11(3):R25.
- Robinson MD, McCarthy DJ, Smyth GK (2010) edgeR: A Bioconductor package for differential expression analysis of digital gene expression data. *Bioinformatics* 26(1):139–140.
- Zdobnov EM, Apweiler R (2001) InterProScan: An integration platform for the signature-recognition methods in InterPro. *Bioinform* 17(9):847–848.
- Wei H, et al. (2013) Global transcriptomic profiling of aspen trees under elevated [CO<sub>2</sub>] to identify potential molecular mechanisms responsible for enhanced radial growth. *J Plant Res* 126(2):305–320.
- Berth S, et al. (2011) Disruption of LACCASE4 and 17 results in tissue-specific alterations to lignification of *Arabidopsis thaliana* stems. *Plant Cell* 23(3):1124–1137.
- MacKinnon DP, Lockwood CM, Hoffman JM, West SG, Sheets V (2002) A comparison of methods to test mediation and other intervening variable effects. *Psychol Methods* 7(1):83–104.

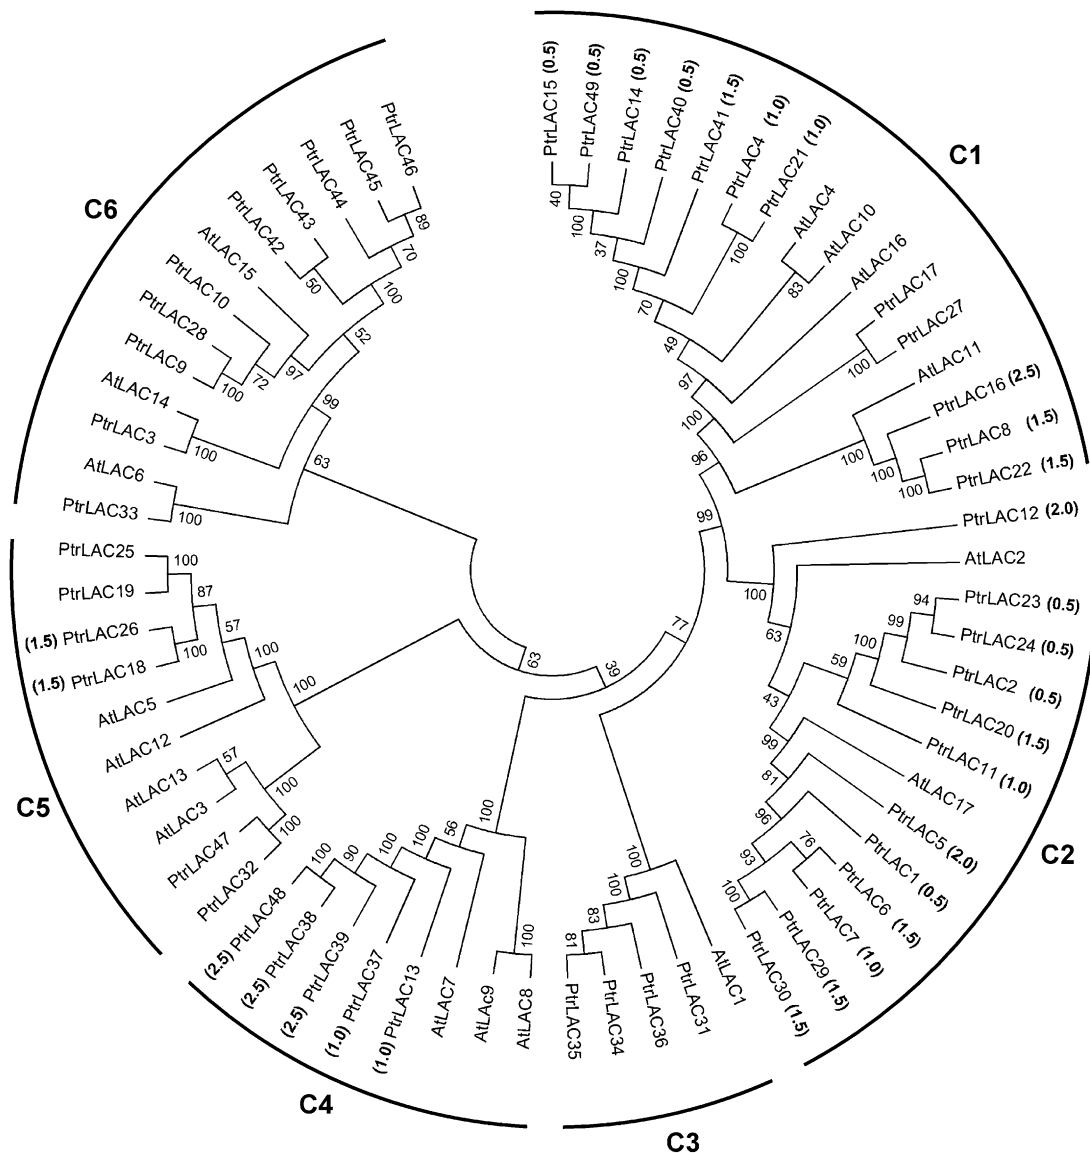

**Fig. S1.** Phylogenetic relationships of 49 *P. trichocarpa* laccases and 17 *Arabidopsis* laccases. Six clades are indicated by C1–C6. Penalty scores for mismatched patterns in ptr-miR397a:PtrLAC duplexes within a 20-base sequence window are shown in parentheses. Among the 17 PtrLACs abundantly expressed in SDX, 13 (PtrLAC2, 7, 11, 12, 14, 15, 18, 23, 24, 26, 30, 40, and 49) are targets of ptr-miR397a, whereas the other 4 (PtrLAC 17, 19, 25, and 27) are not targets.

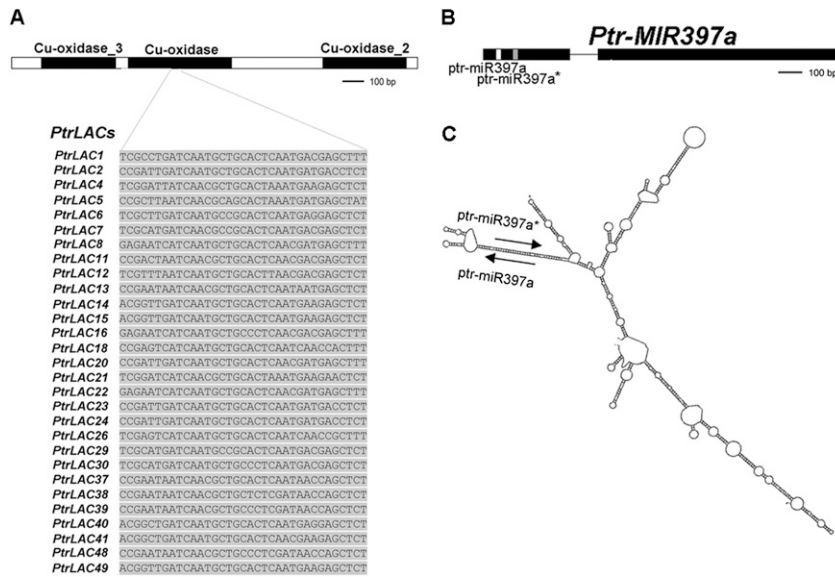

**Fig. 52.** Ptr-miR397a and its targets. (A) Ptr-miR397a targets 29 *PtrLACs* for cleavage. (B) *Ptr-MIR397a* gene structure with the location of ptr-miR397a and ptr-miR397a\* shown. Black boxes represent exons. A 116-bp intron was found in *Ptr-MIR397a* by aligning the cDNA sequence against the genome sequence (v2.2). (C) The predicted secondary structure of the first 800 nucleotides of *Ptr-MIR397a* cDNA. Arrows indicate the orientation of ptr-miR397a and ptr-miR397a\*.

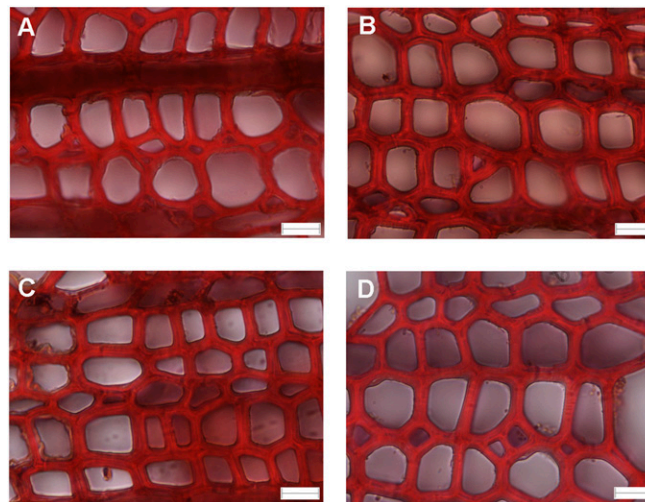

**Fig. 53.** Comparison of wood anatomical structures between ptr-miR397a transgenic and WT plants. Digital images of transverse stem sections from (A) 397-WT1, (B) 397-WT2, (C) 397-6, and (D) 397-10 were taken under a light microscope at  $\times 1,000$  magnification. (Scale bars, 10  $\mu\text{m}$ .)

**Table S1. Identification of 49 laccase gene models in the *P. trichocarpa* genome**

| Laccase name    | Gene model       |
|-----------------|------------------|
| <i>PtrLAC1</i>  | POPTR_0001s14010 |
| <i>PtrLAC2</i>  | POPTR_0001s18500 |
| <i>PtrLAC3</i>  | POPTR_0001s21380 |
| <i>PtrLAC4</i>  | POPTR_0001s25580 |
| <i>PtrLAC5</i>  | POPTR_0001s35740 |
| <i>PtrLAC6</i>  | POPTR_0001s41160 |
| <i>PtrLAC7</i>  | POPTR_0001s41170 |
| <i>PtrLAC8</i>  | POPTR_0004s16370 |
| <i>PtrLAC9</i>  | POPTR_0005s22240 |
| <i>PtrLAC10</i> | POPTR_0005s22250 |
| <i>PtrLAC11</i> | POPTR_0006s08740 |
| <i>PtrLAC12</i> | POPTR_0006s08780 |
| <i>PtrLAC13</i> | POPTR_0006s09520 |
| <i>PtrLAC14</i> | POPTR_0006s09830 |
| <i>PtrLAC15</i> | POPTR_0006s09840 |
| <i>PtrLAC16</i> | POPTR_0007s13050 |
| <i>PtrLAC17</i> | POPTR_0008s06430 |
| <i>PtrLAC18</i> | POPTR_0008s07370 |
| <i>PtrLAC19</i> | POPTR_0008s07380 |
| <i>PtrLAC20</i> | POPTR_0009s03940 |
| <i>PtrLAC21</i> | POPTR_0009s04720 |
| <i>PtrLAC22</i> | POPTR_0009s10550 |
| <i>PtrLAC23</i> | POPTR_0009s15840 |
| <i>PtrLAC24</i> | POPTR_0009s15860 |
| <i>PtrLAC25</i> | POPTR_0010s19080 |
| <i>PtrLAC26</i> | POPTR_0010s19090 |
| <i>PtrLAC27</i> | POPTR_0010s20050 |
| <i>PtrLAC28</i> | POPTR_0011s06880 |
| <i>PtrLAC29</i> | POPTR_0011s12090 |
| <i>PtrLAC30</i> | POPTR_0011s12100 |
| <i>PtrLAC31</i> | POPTR_0012s04620 |
| <i>PtrLAC32</i> | POPTR_0013s14890 |
| <i>PtrLAC33</i> | POPTR_0014s09610 |
| <i>PtrLAC34</i> | POPTR_0015s04340 |
| <i>PtrLAC35</i> | POPTR_0015s04350 |
| <i>PtrLAC36</i> | POPTR_0015s04370 |
| <i>PtrLAC37</i> | POPTR_0016s11500 |
| <i>PtrLAC38</i> | POPTR_0016s11520 |
| <i>PtrLAC39</i> | POPTR_0016s11540 |
| <i>PtrLAC40</i> | POPTR_0016s11950 |
| <i>PtrLAC41</i> | POPTR_0016s11960 |
| <i>PtrLAC42</i> | POPTR_0019s11810 |
| <i>PtrLAC43</i> | POPTR_0019s11820 |
| <i>PtrLAC44</i> | POPTR_0019s11830 |
| <i>PtrLAC45</i> | POPTR_0019s11850 |
| <i>PtrLAC46</i> | POPTR_0019s11860 |
| <i>PtrLAC47</i> | POPTR_0019s14530 |
| <i>PtrLAC48</i> | POPTR_0091s00270 |
| <i>PtrLAC49</i> | POPTR_0958s00200 |

**Table S2. NMR-derived H:G:S and interunit linkage data for WT and transgenic lignin samples**

| Sample | %H  | %G   | %S   | %PB | S/G  | %A   | %B  | %C  | %SD |
|--------|-----|------|------|-----|------|------|-----|-----|-----|
| WT1    | 0.2 | 32.3 | 67.5 | 2.5 | 2.09 | 86.5 | 3.7 | 7.3 | 2.4 |
| 397-1  | 0.2 | 31.3 | 68.5 | 2.1 | 2.19 | 88.0 | 3.1 | 6.6 | 2.3 |
| 397-9  | 0.3 | 24.7 | 74.9 | 2.9 | 3.03 | 89.9 | 2.3 | 6.0 | 1.8 |
| 397-10 | 0.3 | 28.0 | 71.8 | 2.4 | 2.56 | 88.5 | 2.9 | 6.1 | 2.6 |

%PB is based on the total lignin and was not included in the total lignin. A,  $\beta$ -O-4 ( $\beta$ -aryl ether); B,  $\beta$ -5 (phenylcoumaran); C,  $\beta$ - $\beta$  (resinol); SD,  $\beta$ -1 (spirodienone) (see Figs. 4 and 5 for structures).

**Table S3. Effects on transcript abundance of 34 SDX-expressed laccase genes by *Ptr-MIR397a* overexpression**

| Gene            | Read count average in WT SDX | Read count average in transgenic SDX | logFC | logCPM | P value | FDR              |
|-----------------|------------------------------|--------------------------------------|-------|--------|---------|------------------|
| <i>PtrLAC1</i>  | 21.49                        | 3.04                                 | -2.85 | 2.92   | <0.001  | <b>&lt;0.001</b> |
| <i>PtrLAC2</i>  | 85.23                        | 14.61                                | -2.38 | 5.00   | <0.001  | <b>&lt;0.001</b> |
| <i>PtrLAC24</i> | 243.72                       | 55.57                                | -1.97 | 6.68   | <0.001  | <b>&lt;0.001</b> |
| <i>PtrLAC18</i> | 408.64                       | 106.52                               | -1.91 | 7.51   | <0.001  | <b>&lt;0.001</b> |
| <i>PtrLAC23</i> | 204.93                       | 61.55                                | -1.58 | 6.60   | <0.001  | <b>&lt;0.001</b> |
| <i>PtrLAC40</i> | 148.70                       | 46.44                                | -1.73 | 6.17   | <0.001  | <b>&lt;0.001</b> |
| <i>PtrLAC15</i> | 193.96                       | 74.23                                | -1.40 | 6.70   | <0.001  | <b>&lt;0.001</b> |
| <i>PtrLAC26</i> | 107.71                       | 42.92                                | -1.28 | 5.88   | <0.001  | <b>&lt;0.001</b> |
| <i>PtrLAC14</i> | 159.20                       | 65.55                                | -1.30 | 6.47   | <0.001  | <b>&lt;0.001</b> |
| <i>PtrLAC41</i> | 23.78                        | 9.43                                 | -1.42 | 3.70   | <0.001  | <b>&lt;0.001</b> |
| <i>PtrLAC49</i> | 130.69                       | 54.82                                | -1.27 | 6.20   | <0.001  | <b>&lt;0.001</b> |
| <i>PtrLAC20</i> | 30.16                        | 58.18                                | 1.10  | 5.68   | <0.001  | <b>&lt;0.001</b> |
| <i>PtrLAC30</i> | 51.49                        | 32.79                                | -0.63 | 5.23   | <0.001  | <b>0.007</b>     |
| <i>PtrLAC44</i> | 26.40                        | 17.20                                | -0.70 | 4.29   | <0.001  | <b>0.016</b>     |
| <i>PtrLAC45</i> | 22.39                        | 14.56                                | -0.72 | 4.05   | <0.001  | <b>0.017</b>     |
| <i>PtrLAC8</i>  | 5.16                         | 3.25                                 | -0.73 | 1.92   | 0.001   | <b>0.030</b>     |
| <i>PtrLAC25</i> | 118.27                       | 179.58                               | 0.69  | 7.36   | 0.001   | <b>0.035</b>     |
| <i>PtrLAC46</i> | 17.28                        | 11.54                                | -0.64 | 3.70   | 0.001   | <b>0.039</b>     |
| <i>PtrLAC43</i> | 46.95                        | 32.12                                | -0.54 | 5.16   | 0.001   | <b>0.049</b>     |
| <i>PtrLAC6</i>  | 7.17                         | 4.68                                 | -0.56 | 2.40   | 0.001   | 0.053            |
| <i>PtrLAC29</i> | 19.64                        | 13.86                                | -0.54 | 3.93   | 0.003   | 0.113            |
| <i>PtrLAC21</i> | 69.36                        | 50.62                                | -0.43 | 5.79   | 0.006   | 0.164            |
| <i>PtrLAC42</i> | 23.67                        | 17.14                                | -0.46 | 4.23   | 0.006   | 0.168            |
| <i>PtrLAC7</i>  | 109.19                       | 82.45                                | -0.38 | 6.48   | 0.014   | 0.261            |
| <i>PtrLAC12</i> | 133.44                       | 106.64                               | -0.33 | 6.82   | 0.050   | 0.515            |
| <i>PtrLAC33</i> | 11.33                        | 9.23                                 | -0.25 | 3.29   | 0.100   | 0.707            |
| <i>PtrLAC11</i> | 313.90                       | 262.03                               | -0.31 | 8.10   | 0.113   | 0.735            |
| <i>PtrLAC17</i> | 201.96                       | 236.67                               | 0.25  | 7.83   | 0.188   | 0.865            |
| <i>PtrLAC5</i>  | 8.12                         | 7.01                                 | -0.33 | 2.87   | 0.224   | 0.911            |
| <i>PtrLAC19</i> | 185.25                       | 163.46                               | -0.16 | 7.40   | 0.273   | 0.946            |
| <i>PtrLAC16</i> | 21.93                        | 20.51                                | -0.06 | 4.38   | 0.573   | 1.000            |
| <i>PtrLAC27</i> | 266.91                       | 284.15                               | 0.08  | 8.13   | 0.609   | 1.000            |
| <i>PtrLAC4</i>  | 2.93                         | 2.64                                 | -0.17 | 1.44   | 0.483   | 1.000            |
| <i>PtrLAC47</i> | 3.80                         | 3.87                                 | 0.08  | 1.94   | 0.894   | 1.000            |

cpm, read counts per million reads; FC, fold change. FDR value <0.05 is bold.

**Table S4. Fifty enriched protein domains identified from 459 DEGs in the context of genomic background**

| Interpro ID | <i>P</i> value | Description                                 | Gene number in DEGs vs. that in the genome |
|-------------|----------------|---------------------------------------------|--------------------------------------------|
| IPR001154   | 0              | DNA topoisomerase II, eukaryotic-type       | 2:2                                        |
| IPR017761   | 5.2375E-26     | Laccase                                     | 20:34                                      |
| IPR002355   | 1.51259E-24    | Multicopper oxidase, copper-binding         | 20:38                                      |
| IPR001117   | 9.8465E-22     | Multicopper oxidase, type 1                 | 20:48                                      |
| IPR011706   | 9.8465E-22     | Multicopper oxidase, type 2                 | 20:48                                      |
| IPR011707   | 9.8465E-22     | Multicopper oxidase, type 3                 | 20:48                                      |
| IPR008972   | 4.2319E-17     | Cupredoxin                                  | 20:74                                      |
| IPR001099   | 8.0448E-07     | Chalcone/stilbene synthase, N-terminal      | 4:5                                        |
| IPR011141   | 8.0448E-07     | Polyketide synthase, type III               | 4:5                                        |
| IPR018088   | 8.0448E-07     | Chalcone/stilbene synthase, active site     | 4:5                                        |
| IPR001404   | 2.8492E-06     | Heat shock protein Hsp90                    | 5:10                                       |
| IPR004022   | 6.1593E-06     | DDT family                                  | 5:11                                       |
| IPR018500   | 6.1593E-06     | DDT subgroup                                | 5:11                                       |
| IPR018501   | 6.1593E-06     | DDT superfamily                             | 5:11                                       |
| IPR000823   | 1.03912E-05    | Plant peroxidase                            | 7:28                                       |
| IPR001371   | 0.000012151    | Glycoside hydrolase, family 14B, plant      | 5:12                                       |
| IPR011684   | 0.000012151    | KIP1-like                                   | 5:12                                       |
| IPR018238   | 0.000012151    | Glycoside hydrolase, family 14              | 5:12                                       |
| IPR001752   | 2.02377E-05    | Kinesin, motor region                       | 11:86                                      |
| IPR001554   | 0.00006285     | Glycoside hydrolase, family 14              | 5:15                                       |
| IPR006766   | 0.00006285     | Phosphate-induced protein 1                 | 5:15                                       |
| IPR002068   | 0.000068297    | Heat shock protein Hsp20                    | 6:24                                       |
| IPR010255   | 0.000211595    | Haem peroxidase                             | 7:40                                       |
| IPR002483   | 0.000220813    | Splicing factor PWI                         | 3:5                                        |
| IPR016140   | 0.00111454     | Bifunctional inhibitor/plant lipid transfer | 6:35                                       |
| IPR008978   | 0.00136175     | HSP20-like chaperone                        | 6:36                                       |
| IPR008263   | 0.00207824     | Glycoside hydrolase, family 16              | 4:15                                       |
| IPR000167   | 0.00248467     | Dehydrin                                    | 2:3                                        |
| IPR002160   | 0.00248467     | Proteinase inhibitor I3, Kunitz legume      | 2:3                                        |
| IPR002205   | 0.00248467     | DNA topoisomerase, type IIA                 | 2:3                                        |
| IPR011065   | 0.00248467     | Kunitz inhibitor ST1-like                   | 2:3                                        |
| IPR013757   | 0.00248467     | DNA topoisomerase, type IIA                 | 2:3                                        |
| IPR013758   | 0.00248467     | DNA topoisomerase, type IIA                 | 2:3                                        |
| IPR002016   | 0.00262713     | Haem peroxidase, plant/fungal/bacterial     | 7:55                                       |
| IPR012328   | 0.0029749      | Chalcone and stilbene synthases             | 4:16                                       |
| IPR003594   | 0.0092599      | ATP-binding region, ATPase-like             | 7:65                                       |
| IPR001241   | 0.0098046      | DNA topoisomerase, type IIA                 | 2:4                                        |
| IPR013506   | 0.0098046      | DNA topoisomerase, type IIA                 | 2:4                                        |
| IPR013759   | 0.0098046      | DNA topoisomerase, type IIA                 | 2:4                                        |
| IPR015310   | 0.0098046      | Activator of Hsp90 ATPase, N-terminal       | 2:4                                        |
| IPR013770   | 0.0099303      | Plant lipid transfer protein                | 4:20                                       |
| IPR004648   | 0.0133661      | Tetrapeptide transporter                    | 3:11                                       |
| IPR016197   | 0.0197349      | Chromo domain-like                          | 3:12                                       |
| IPR000232   | 0.0206148      | Heat shock factor (HSF)-type, DNA-binding   | 4:23                                       |
| IPR010544   | 0.0241763      | Kinesin-related                             | 2:5                                        |
| IPR013760   | 0.0241763      | DNA topoisomerase, type IIA, central        | 2:5                                        |
| IPR018368   | 0.028073       | Chaperonin ClpA/B, conserved site           | 3:13                                       |
| IPR013126   | 0.0315926      | Heat shock protein 70                       | 4:25                                       |
| IPR000109   | 0.043247923    | TGF-beta receptor                           | 5:42                                       |
| IPR003480   | 0.046569755    | Transferase                                 | 4:27                                       |

**Table S5. Gene models of the genes listed in Fig. 6**

| Gene name         | Gene model       |
|-------------------|------------------|
| <i>PtrPO2</i>     | POPTR_0003s21620 |
| <i>PtrPO3</i>     | POPTR_0002s01960 |
| <i>PtrPO6</i>     | POPTR_0007s13420 |
| <i>PtrPO34</i>    | POPTR_0001s04840 |
| <i>PtrARF2</i>    | POPTR_0015s11660 |
| <i>PtrMYB52</i>   | POPTR_0007s01430 |
| <i>PtrDAG1</i>    | POPTR_0014s09640 |
| <i>PtrUNE12</i>   | POPTR_0002s04620 |
| <i>PtrHSFB4</i>   | POPTR_0001s28040 |
| <i>PtrMYB50</i>   | POPTR_0015s09430 |
| <i>PtrMYB52</i>   | POPTR_0007s01430 |
| <i>PtrMYB73</i>   | POPTR_0007s10490 |
| <i>PtrNF-YC9</i>  | POPTR_0013s02580 |
| <i>PtrABF3</i>    | POPTR_0009s10400 |
| <i>PtrARF8</i>    | POPTR_0017s01870 |
| <i>PtrARF7</i>    | POPTR_0006s07740 |
| <i>PtrMYBCDC5</i> | POPTR_0019s03520 |
| <i>PtrMYB42</i>   | POPTR_0003s11360 |
| <i>PtrHB-1-1</i>  | POPTR_0011s05660 |
| <i>PtrHB-1</i>    | POPTR_0004s04840 |



**Table S6. Primers used for qRT-PCR analysis of laccase gene expression**

| Gene name         | Forward primer               | Reverse primer               |
|-------------------|------------------------------|------------------------------|
| <i>PtrLAC1</i>    | ATTAATGGACTCCCAGGGCCATTA     | TTCACATACACAGCATCAGCTTCC     |
| <i>PtrLAC2</i>    | AGTTTTGAGTTTCACCAATATTACCTG  | CCAGAGGCAGCTCATAGCAAAT       |
| <i>PtrLAC3</i>    | TCACCATCAATGGAGAACCAGGATA    | GCCAGGGGTGATCATTAGATAGTCT    |
| <i>PtrLAC4</i>    | AGGGAGGATATAATTTACCAAGTACGG  | CAATGGTGTGATTTTGAAGGGTTTA    |
| <i>PtrLAC5</i>    | GGCAAGACTTACATGCTCCGCTTA     | AAACAGCATCAACATCAACAATGGTA   |
| <i>PtrLAC6</i>    | CTCTGATGCTACACTATCAATGGAT    | TGGTTTACATAAAATAGCATCAACAC   |
| <i>PtrLAC7</i>    | CTCTGATGCTACACTATCAATGGAT    | GTTTGCTATGCTGAAGAAGAGCTCG    |
| <i>PtrLAC8</i>    | CATACCATTAATGGGAAGCCAGGGA    | CAATCAGTACTGCTTGAGTGGTAAAT   |
| <i>PtrLAC9</i>    | CATTCACTGGCATGGAGTGAACAA     | GCCACCATAATGTTCTTCTTCGTT     |
| <i>PtrLAC10</i>   | GAGACACAATCTATGTTACGGTCCAT   | CCAGGTTGGATTGGACACTGTGTA     |
| <i>PtrLAC11</i>   | GGCCTTCCAGGGCCTTTATACAAT     | CTGGACTGATGAGGAGCGTGTCA      |
| <i>PtrLAC12</i>   | CCAGGAAAAACCTATCTCCTTCGTT    | CGGGGTGATGAGTACAATGTGGGT     |
| <i>PtrLAC13</i>   | CTACCCCTTGCTCTCAAACAGAATATT  | CGATGACAACAACGCCAGTGACC      |
| <i>PtrLAC14</i>   | TGCCTCTTCCCTGCTTTGGTCC       | GCCATTGACGGTAACAATCGGC       |
| <i>PtrLAC15</i>   | TCTTGCTGTGCTCCTCCTCCCC       | GCCATTGACGGTAACAATCGGC       |
| <i>PtrLAC16</i>   | CATACTTTGCAATGGAGATTGAATCA   | ATCTGCCTGGAACCTGGTTGGCTA     |
| <i>PtrLAC17</i>   | ACCTCCCAGTGACCTCCCCAAC       | CTTTGTGTTGAGCACTTGAGCCAG     |
| <i>PtrLAC18</i>   | GGTCAACCTGGTGATCTTTTAACTGC   | AACTGTAACTTGTTGGTGGCTATG     |
| <i>PtrLAC19</i>   | CTTGGTAGAGAATGGAGTTGGAC      | TTGTCGGGCTTATGAATCCAAC       |
| <i>PtrLAC20</i>   | GCTGATCCTGAGGCAGTGATTAGA     | AAGGTTGGTCTCAAAGGCTTCACA     |
| <i>PtrLAC21</i>   | CACGGAGGGTATAATTTATCAGTACAT  | CAACGGTGTGATTTTGAAGGGTTTT    |
| <i>PtrLAC22</i>   | ATACATTTACCTTGGAGTTGAACAG    | CAATTAGTATGGTTTGAGTTGTAAGG   |
| <i>PtrLAC23</i>   | CGAGGCACTACAAGTTCAACATAG     | CCATTAACAGTCACCATGCTCTTC     |
| <i>PtrLAC24</i>   | AGTTTTGAGTTTCACCAATAGTACCTA  | CCAGAGGCAGCTCATAGCAAAG       |
| <i>PtrLAC25</i>   | CTTGGTCGAGAATGGAGTCCGGAG     | GCTTATGAATTTCAACAACTGGTACG   |
| <i>PtrLAC26</i>   | GGTCAACCTGGTGATCTTTATAATTGT  | TAAGATAAGAGGCATCAGCACCAATA   |
| <i>PtrLAC27</i>   | ATGAGTCAATACTACCACCTCCT      | CTATACTCCTCCTCCCGCATC        |
| <i>PtrLAC28</i>   | CACAAGACTCTGCAGCAACAAGAA     | GGCTGTTTCACTCCATGCCAGTGA     |
| <i>PtrLAC29</i>   | AGGCCCAAATGTCTGTGATGCTTAT    | AAGAAGAGCTCGTATTGAGTGCG      |
| <i>PtrLAC30</i>   | GCAGATCCAGAGGCGATCATTAGT     | AAGAAGAGCTCGTATTGAGGGCA      |
| <i>PtrLAC31</i>   | ATGCCGTATCCATTCTCAGCTCAG     | GGCATTCCATTTATGGTGAAGCGT     |
| <i>PtrLAC32</i>   | GTAATCTTCAGTTTCCAAGCTCATTT   | TTTGATCACAAGAGTATCGCCATCG    |
| <i>PtrLAC33</i>   | GGCACCTTCTTCTGGCATGCTCAT     | AGATGTACAATATCCTGAAGCCAGTA   |
| <i>PtrLAC34</i>   | GGCGTTACCGTGTTGTTCTTCCAC     | CAATCCGATTTTGGACCTTAATGAATAC |
| <i>PtrLAC35</i>   | ACGAAGCAGCTTCTAATGGTGAAC     | TCTGAGCAATCCGATTTTGGACC      |
| <i>PtrLAC36</i>   | GGGATCCAGATGAAGTTGAAAACAG    | GCTATCGCAAAGAAGAGCTCATCC     |
| <i>PtrLAC37</i>   | TGTTGATGTCGAAAACCAGGCAGAA    | GATTGGCTATCTTGA AAAAGAGCTGG  |
| <i>PtrLAC38</i>   | GCTTCTGCTGCAATTGTGGAACG      | AAGCGTTGGGCTGGCAAGCTG        |
| <i>PtrLAC39</i>   | GATCCTGTCAACGACCATAAAGAA     | CCAGATGACAGTGAAGAAGACCAC     |
| <i>PtrLAC40</i>   | AAGGCGGTTTCACTTGGCCAGTCC     | TAGGTGGCATCAACTTCCACGACA     |
| <i>PtrLAC41</i>   | GGGCGTTTTACACTTCCAGTCCG      | GTAGGTGGCATCAACTTCCACAAG     |
| <i>PtrLAC42</i>   | ACAATTATTATTGGATCTTGGTTTAAAG | CATTGATGGTAAGACTGTTGGATATATT |
| <i>PtrLAC43</i>   | GAAATCAACTGTGCACTTCCG        | GGCGCATACTTGTGCCGTTGTAT      |
| <i>PtrLAC44</i>   | ACAATTATTATTGGATCTTGGTTTAAAG | CATTGATGGTAAGACTGTTGGATATATT |
| <i>PtrLAC45</i>   | ACAATTATTATTGGATCTTGGTTTAAAG | CCATTGATGGTAAGACTATTGGATGG   |
| <i>PtrLAC46</i>   | GCAACTGGTGCTGGACCTGCAAT      | TTAACCTTCAAACGGTATGTGTTTTCT  |
| <i>PtrLAC47</i>   | GTAATCATCAGTTTCCAAGCATCTTC   | CTTGATCACAAGAGTATCACCCTCA    |
| <i>PtrLAC48</i>   | GCTCATTCTATGTGAAAACCTTACAG   | AGCGTTGGGCTGGCAAGCTT         |
| <i>PtrLAC49</i>   | CAGCAAATATGGAGTACTCCAATTG    | TGCCGAATCCTGCACTCGACC        |
| <i>Ptr18SrRNA</i> | CGAAGACGATCAGATACCGTCTCA     | TTTCTATAAGGTGCTGCGGAGT       |

**Table S7. Primers used for validation of ptr-miR397a targets**

| Gene name       | Gene-specific primer         | Nested gene-specific primer |
|-----------------|------------------------------|-----------------------------|
| <i>PtrLAC1</i>  | ACGTAAGGTCTAGCAGTCATGAAAAATT | GTGGTGGGTTTGGTCTTGAGAAGG    |
| <i>PtrLAC2</i>  | GGCAATGGGTTTGGTCTTCAAGAAGAAC | GTGGTCTGCTCTGCTGTTATAACCAAG |
| <i>PtrLAC13</i> | TGTAATAAGATCCCACCTTCTGGTCT   | CGATGACAACAACGCCAGTGACC     |
| <i>PtrLAC18</i> | CTGCCATGTAATATCGGCCAGGTAGT   | CTGTGGTTTGGCCAGGTCTAGCATG   |
| <i>PtrLAC21</i> | CCACGGTTTGGCGTCAAGAAGCAGTTT  | CAACGGTGTGATTTTGAAGGGTTTT   |
| <i>PtrLAC26</i> | CTGCCATGTAATATCGGCCAGGTAGT   | CAGTGGTTTGGCCTGGTCTAGCATT   |
| <i>PtrLAC30</i> | AGTCGGGTTTGGTTTTCAAGAAGAAC   | GGTTTGTCCAGGGGTAATGAGAAGT   |
